# Supplementary material
Source: PubMed Central journal article supplement (PMC6696921)

## **Supplemental Material**

**Supplemental Figure 1. Work flow.** The included research subjects were from the University of Kentucky Alzheimer’s Disease Center (UK-ADC) autopsy cohort. From each individual, cerebellum samples snap-frozen at autopsy were used to isolate DNA (for evaluation of HS-Aging risk alleles) and to produce brain extracts for thyroid hormone assays. Histopathologic evaluation included conventional neuropathologic assessments in accordance with the National Institutes on Aging-Alzheimer’s Association consensus guideline recommendations for neuropathologic diagnosis of AD neuropathologic changes (Montine et al., 2012). Additional, digital neuropathologic methods were applied to assess the TDP-43 pathology in the same cases. Finally, the clinical, genetic, pathologic, and biochemical parameters were analyzed in association with each other to detect evidence of disease-driving mechanisms in brains harboring TDP-43 pathology.

**Supplemental Figure 2. Representative primary data from SNP characterization using TaqMan® Pre-designed SNP Genotyping Assays.** Shown here are results for rs5848 (*GRN* risk allele). Note the clear differentiation between homozygote (GG and TT) and heterozygous (GT) cases. “NTC” refers to no template controls.

**Supplemental Figure 3. Representative results of T4 and T3 ELISA assays.** Brain extracts were analyzed on multiple 96-well ELISA microplates, according to manufacturer instructions. In order to account for variability between plates, an independent standard curve was performed on each plate and used to analyze the samples on that plate only. Standard data was fit to a 4-parameter logistic equation. Shown are independent standard replicates run for T4 (A) and T3 (B) for each set of samples, with manufacturer-provided standards. A representative curve fit is shown for the first set of samples analyzed. In the present study, the average detected level of T4 was approximately 4.8  $\mu\text{g/dL}$ , and the average detected level of T3 was approximately 1.9  $\text{ng/mL}$ , denoted on each graph with a red arrow. (Note that these values were standardized to tissue weight for reporting). These values of tissue T3 and T4 were within numerical ranges where the standard curve of this assay was relatively stable.

**Supplemental Figure 4. Results of triiodothyronine (T3) and thyroxine (T4) assays from human brain parenchymal extracts, showing ELISA results from both superior middle and temporal (SMTG; Brodmann Areas 21 and 22) and cerebellum (CBL) across a range of Alzheimer's disease pathologic severity.** These analyses were performed on a convenience subsample of cases (n=21) for which snap-frozen low-PMI biosamples were available from both SMTG and CBL regions. Note that there is a trend for more advanced Alzheimer's disease pathology (higher Braak NFT stages) to have lower T3 levels in SMTG, but not CBL. The implications of these results are currently unknown – it is possible that pathology affects the thyroid hormone levels (perhaps in association with disruption of blood-brain barrier), or, perhaps, the thyroid hormone levels influences the pathology.

**Supplemental Figure 5. Results of triiodothyronine (T3) thyroxine (T4) assays from human brain parenchymal extracts, comparing T3 and T4 results from cerebellum.** From each case (n=136 included), an extract was made from the cerebellum snap-frozen at autopsy, and then evaluated using enzyme-linked immunosorbent assay (ELISA)-based assay kits. Each data point represents an individual case. The T3 and T4 assays were run separately. There was a moderately strong correlation between the T3 and T4 readings for individual cases. ( $r=0.50$ ,  $p<0.0001$ ).

**Supplemental Figure 6. Results of T3 and T4 ELISA assays on brain extracts (for analyses in the current study), stratified by factors that could indicate systematic technical bias.** The two factors shown here are the number of years store at  $-80^{\circ}\text{C}$  in freezers between autopsy and experimental assay (A,B) and the number of hours between death and post-mortem examination (C,D). Results for triiodothyronine (T3; A, C) and thyroxine (T4; B, D) are shown. Note that on all of these charts, the  $R^2$  correlation coefficient is  $<0.02$  and the regression probability statistic was  $p>0.1$  for all of these, indicating a lack of impact detected for these particular technical factors.

**Supplemental Figure 7. Summary figure.** The analytic results are compatible with the hypothesis that TDP-43 pathology in aging is affected by interactions between a complex set of factors that include genetic risk alleles and comorbid pathologies, particularly advanced Alzheimer's disease. Distinct risk alleles appear to affect different disease-affecting nodes and pathways. The current study is compatible with the hypothesis that transport of thyroid hormone from the blood (thyroxine, or T4), and conversion into active triiodothyronine (T3) is a possible compensatory mechanism that is affected by gene variants near the main brain thyroid hormone transporter gene.

## Supplemental Tables

**Supplemental Table 1.** Clinical, genetic, pathologic, and biochemical features of the present cohort (n=136), stratified by *TMEM106B* risk allele (SNP rs1990622) status

|                                       | rs1990622 status ( <i>TMEM106B</i> gene) |          |          | p-value: risk vs non-risk allele(s) |
|---------------------------------------|------------------------------------------|----------|----------|-------------------------------------|
|                                       | AA                                       | AG       | GG       |                                     |
| n                                     | 55                                       | 58       | 23       | NA                                  |
| Age at death, Avg                     | 84.1                                     | 83.6     | 84.7     | 0.960                               |
| % Female                              | 56.4                                     | 51.7     | 73.9     | 0.078                               |
| % Normal cognition/clinical state     | 26.4                                     | 31.0     | 30.4     | 0.877                               |
| % Demented cognition/clinical state   | 54.7                                     | 63.8     | 43.5     | 0.159                               |
| MMSE, Avg                             | 19.8                                     | 19.7     | 23.3     | 0.067                               |
| % <i>SLCO1A2/IAPP</i> risk allele(s)  | 29.1                                     | 15.5     | 34.8     | 0.197                               |
| % <i>GRN</i> risk allele(s)           | 38.2                                     | 50.0     | 26.1     | 0.107                               |
| % <i>TMEM106B</i> risk allele(s)      | 100.0                                    | 100.0    | 0.0      | NA                                  |
| % <i>ABCC9</i> risk allele(s)         | 23.6                                     | 22.4     | 21.7     | 0.895                               |
| % <i>APOE</i> ε4 allele [+]           | 30.0                                     | 33.3     | 27.3     | 0.689                               |
| % Braak NFT stage V or VI             | 43.6                                     | 51.7     | 60.9     | 0.253                               |
| % HS-Aging                            | 27.3                                     | 29.3     | 21.7     | 0.518                               |
| DG: % [+] TDP-43 inclusions           | 33                                       | 33       | 13       | 0.147                               |
| DG: median # inclusions in [+] cases  | 4.5                                      | 2        | 5        |                                     |
| CA1: % [+] TDP-43 inclusions          | 40                                       | 40       | 22       | 0.234                               |
| CA1: median # inclusions in [+] cases | 6.5                                      | 7        | 1        |                                     |
| CA1 TDP-43 neurites, median           | 1.96E-03                                 | 1.01E-03 | 2.49E-03 | 0.605                               |
| Sub: % [+] TDP-43 inclusions          | 33                                       | 33       | 13       | 0.534                               |
| Sub: median # inclusions in [+] cases | 9.5                                      | 14       | 6        |                                     |
| Sub TDP-43 neurites, median           | 2.42E-03                                 | 1.67E-03 | 3.20E-03 | 0.922                               |
| % with Frontal Cx TDP-43              | 7.3                                      | 5.2      | 0        | 0.602                               |
| T4 fg/mg brain tissue, Avg            | 189.17                                   | 199.5    | 188.06   | 0.682                               |
| T3 fg/mg brain tissue, Avg            | 7.6                                      | 7.59     | 8        | 0.539                               |
| Average of T3/T4 ratio, Avg           | 0.040                                    | 0.038    | 0.043    | 0.145                               |
| PMI (hrs), Avg                        | 4.6                                      | 5.2      | 3.4      | 0.505                               |

\*- *APOE* genotype was available on 120/136 (88.2%) of the included subjects, and final MMSE scores were available for 126/136 (92.6%) of subjects. N/A: Not applicable.

**Supplemental Table 2.** Clinical, genetic, pathologic, and biochemical features of the present cohort (n=136), stratified by *GRN* risk allele (SNP rs5848) status

|                                        | rs5848 status ( <i>GRN</i> gene) |         |         | p-value: risk vs non-risk allele(s) |
|----------------------------------------|----------------------------------|---------|---------|-------------------------------------|
|                                        | CC                               | CT      | TT      |                                     |
| n                                      | 80                               | 41      | 15      | N/A                                 |
| Age at death, Avg                      | 84.53                            | 83.29   | 82.73   | 0.211                               |
| % Female                               | 61.2                             | 53.7    | 46.7    | 0.272                               |
| % Normal cognition/clinical state      | 30.4                             | 22.5    | 40      | 0.697                               |
| % Demented cognition/clinical state    | 54.4                             | 65      | 46.7    | 0.522                               |
| MMSE, Avg*                             | 21.1                             | 19.26   | 19.5    | 0.319                               |
| % <i>SLCO1A2/IAPP</i> risk allele(s)   | 27.5                             | 17.1    | 26.7    | 0.293                               |
| % <i>GRN</i> risk allele(s)            | 0                                | 100     | 100     | N/A                                 |
| % <i>TMEM106B</i> risk allele(s)       | 78.8                             | 87.8    | 93.3    | 0.107                               |
| % <i>ABCC9</i> risk allele(s)          | 25                               | 17.1    | 26.7    | 0.464                               |
| % <i>APOE</i> $\epsilon$ 4 allele [+]* | 21.4                             | 48.6    | 33.3    | <b>0.008</b>                        |
| % Braak NFT stage V or VI*             | 46.2                             | 56.1    | 53.3    | 0.296                               |
| % HS-Aging                             | 25                               | 29.3    | 33.3    | 0.490                               |
| DG: % [+] TDP-43 inclusions            | 25                               | 32      | 47      | 0.323                               |
| DG: median # inclusions in [+] cases   | 5.5                              | 2       | 1       |                                     |
| CA1: % [+] TDP-43 inclusions           | 31                               | 34      | 73      | 0.209                               |
| CA1: median # inclusions in [+] cases  | 7                                | 7.5     | 6       |                                     |
| CA1 TDP-43 neurites, median            | 1.44E-3                          | 1.40E-3 | 3.13E-3 | 0.689                               |
| Sub: % [+] TDP-43 inclusions           | 25                               | 32      | 47      | 0.978                               |
| Sub: median # inclusions in [+] cases  | 13                               | 15      | 7.5     |                                     |
| Sub TDP-43 neurites, median            | 2.15E-3                          | 1.90E-3 | 2.42E-3 | 0.663                               |
| % with Frontal Cx TDP-43               | 6.2                              | 4.9     | 0       | 0.700                               |
| T4 fg/mg brain tissue, Avg             | 197.6                            | 188.92  | 183.11  | 0.294                               |
| T3 fg/mg brain tissue, Avg             | 7.71                             | 7.29    | 8.47    | 0.852                               |
| Average of T3/T4 ratio, Avg            | 0.039                            | 0.039   | 0.046   | 0.370                               |
| PMI (hrs), Avg                         | 4.8                              | 3.7     | 6.68    | 0.817                               |

\*- *APOE* genotype was available on 120/136 (88.2%) of the included subjects, and final MMSE scores were available for 126/136 (92.6%) of subjects. N/A: Not applicable.

**Supplemental Table 3.** Clinical, genetic, pathologic, and biochemical features of the present cohort (n=136), stratified by *ABCC9* risk allele (SNP rs704180) status

|                                        | rs704180 status ( <i>ABCC9</i> gene) |         |         | p-value:<br>risk vs<br>non-risk<br>allele(s) |
|----------------------------------------|--------------------------------------|---------|---------|----------------------------------------------|
|                                        | AA                                   | AG      | GG      |                                              |
| n                                      | 31                                   | 75      | 30      | N/A                                          |
| Age at death, Avg                      | 82.55                                | 84.92   | 83      | 0.724                                        |
| % Female                               | 64.5                                 | 58.7    | 46.7    | 0.359                                        |
| % Normal cognition/clinical state      | 35.5                                 | 28.4    | 24.1    | 0.372                                        |
| % Demented cognition/clinical state    | 54.8                                 | 58.1    | 55.2    | 0.810                                        |
| MMSE, Avg*                             | 19.11                                | 20.01   | 22.52   | 0.506                                        |
| % <i>SLCO1A2/IAPP</i> risk allele(s)   | 22.6                                 | 25.3    | 23.3    | 0.803                                        |
| % <i>GRN</i> risk allele(s)            | 35.5                                 | 42.7    | 43.3    | 0.464                                        |
| % <i>TMEM106B</i> risk allele(s)       | 83.9                                 | 78.7    | 93.3    | 0.895                                        |
| % <i>ABCC9</i> risk allele(s)          | 100                                  | 0       | 0       | N/A                                          |
| % <i>APOE</i> $\epsilon$ 4 allele [+]* | 29.2                                 | 28.6    | 38.5    | 0.843                                        |
| % Braak NFT stage V or VI*             | 41.9                                 | 53.3    | 50      | 0.307                                        |
| % HS-Aging                             | 32.3                                 | 28.0    | 20.0    | 0.472                                        |
| DG: % [+] TDP-43 inclusions            | 32                                   | 32      | 20      | 0.847                                        |
| DG: median # inclusions in [+] cases   | 2                                    | 5       | 4       |                                              |
| CA1: % [+] TDP-43 inclusions           | 45                                   | 37      | 27      | 0.153                                        |
| CA1: median # inclusions in [+] cases  | 2.5                                  | 8.5     | 11      |                                              |
| CA1 TDP-43 neurites, median            | 1.15E-3                              | 2.47E-3 | 1.25E-3 | 0.140                                        |
| Sub: % [+] TDP-43 inclusions           | 32                                   | 32      | 20      | 0.903                                        |
| Sub: median # inclusions in [+] cases  | 5                                    | 9       | 17      |                                              |
| Sub TDP-43 neurites, median            | 1.93E-3                              | 1.99E-3 | 2.93E-3 | 0.460                                        |
| % with Frontal Cx TDP-43               | 9.7                                  | 5.3     | 0       | 0.195                                        |
| T4 fg/mg brain tissue, Avg             | 184.21                               | 199.77  | 186.92  | 0.231                                        |
| T3 fg/mg brain tissue, Avg             | 6.9                                  | 7.97    | 7.69    | 0.074                                        |
| Average of T3/T4 ratio, Avg            | 0.037                                | 0.040   | 0.041   | 0.156                                        |
| PMI (hrs), Avg                         | 6.3                                  | 4.0     | 4.3     | 0.060                                        |

\*- *APOE* genotype was available on 120/136 (88.2%) of the included subjects, and final MMSE scores were available for 126/136 (92.6%) of subjects. N/A: Not applicable.

**Supplemental Table 4.** Clinical, genetic, pathologic, and biochemical features of the present cohort (n=136), stratified by *SLCO1A2/IAPP* risk allele (SNP rs12301085, a proxy for rs73069071, identified by Roostaei et al (Roostaei et al., 2016)) status.

|                                       | rs12496790 status ( <i>SLCO1A2/IAPP</i> genes) |         |         | p-value: risk vs non-risk allele(s) |
|---------------------------------------|------------------------------------------------|---------|---------|-------------------------------------|
|                                       | AA                                             | AG      | GG      |                                     |
| N                                     | 2                                              | 31      | 103     | N/A                                 |
| Age at death, Avg                     | 72.0                                           | 85.8    | 83.6    | 0.142                               |
| % Female                              | 50                                             | 58.1    | 57.3    | 0.976                               |
| % Normal cognition/clinical state     | 50                                             | 33.3    | 27.5    | 0.452                               |
| % Demented cognition/clinical state   | 50                                             | 46.7    | 59.8    | 0.198                               |
| MMSE, Avg*                            | 17.5                                           | 22.2    | 19.82   | 0.258                               |
| % <i>SLCO1A2/IAPP</i> risk allele(s)  | 100                                            | 100     | 0       | N/A                                 |
| % <i>GRN</i> risk allele(s)           | 50                                             | 32.3    | 43.7    | 0.293                               |
| % <i>TMEM106B</i> risk allele(s)      | 100                                            | 100     | 0       | 0.197                               |
| % <i>ABCC9</i> risk allele(s)         | 50                                             | 19.4    | 23.3    | 0.895                               |
| % <i>APOE</i> ε4 allele [+]*          | 0                                              | 18.5    | 35.2    | 0.069                               |
| % Braak NFT stage V or VI*            | 0                                              | 38.7    | 54.4    | 0.072                               |
| % HS-Aging                            | 0                                              | 29      | 27.2    | 0.992                               |
| DG: % [+] TDP-43 inclusions           | 0                                              | 29      | 30      | 0.829                               |
| DG: median # inclusions in [+] cases  | 0                                              | 6       | 2       |                                     |
| CA1: % [+] TDP-43 inclusions          | 0                                              | 35      | 38      | 0.894                               |
| CA1: median # inclusions in [+] cases | 0                                              | 4       | 7       |                                     |
| CA1 TDP-43 neurites, median           | 8.41E-3                                        | 2.00E-3 | 1.44E-3 | 0.286                               |
| Sub: % [+] TDP-43 inclusions          | 0                                              | 29      | 30      | 0.66                                |
| Sub: median # inclusions in [+] cases | 0                                              | 16      | 7       |                                     |
| Sub TDP-43 neurites, median           | 1.57E-3                                        | 1.97E-3 | 2.25E-3 | 0.934                               |
| % with Frontal Cx TDP-43              | 0                                              | 3.2     | 5.8     | 1                                   |
| T4 fg/mg brain tissue, Avg            | 186.36                                         | 201.76  | 191     | 0.384                               |
| T3 fg/mg brain tissue, Avg            | 6.25                                           | 7.1     | 7.86    | 0.134                               |
| Average of T3/T4 ratio, Avg           | 0.034                                          | 0.035   | 0.041   | 0.058                               |
| PMI (hrs), Avg                        | 2.9                                            | 5.0     | 4.7     | 0.362                               |

\*- *APOE* genotype was available on 120/136 (88.2%) of the included subjects, and final MMSE scores were available for 126/136 (92.6%) of subjects. N/A: Not applicable.

**Supplemental Table 5.** Clinical, genetic, pathologic, and biochemical features of the present cohort (n=136), stratified by *KCNMB2* risk allele (SNP rs12496790, a proxy for rs9637454) status. The risk allele for rs12496790 would be “AA or AG” according to Beecham et al (Beecham et al., 2014).

|                                       | rs12496790 status ( <i>KCNMB2</i> gene) |         |         | p-value: risk vs non-risk allele(s) |
|---------------------------------------|-----------------------------------------|---------|---------|-------------------------------------|
|                                       | AA                                      | AG      | GG      |                                     |
| n                                     | 7                                       | 57      | 72      | N/A                                 |
| Age at death, Avg                     | 85.3                                    | 83.5    | 84.2    | 0.693                               |
| % Female                              | 57.1                                    | 57.9    | 56.9    | 1                                   |
| % Normal cognition/clinical state     | 28.6                                    | 30.4    | 28.2    | 1                                   |
| % Demented cognition/clinical state   | 42.9                                    | 55.4    | 59.2    | 0.466                               |
| MMSE, Avg*                            | 21.57                                   | 20.35   | 20.22   | 0.742                               |
| % <i>SLCO1A2/IAPP</i> risk allele(s)  | 42.9                                    | 28.1    | 19.4    | 0.360                               |
| % <i>GRN</i> risk allele(s)           | 0                                       | 33.3    | 51.4    | <b>0.041</b>                        |
| % <i>TMEM106B</i> risk allele(s)      | 100                                     | 0       | 0       | 0.337                               |
| % <i>ABCC9</i> risk allele(s)         | 14.3                                    | 31.6    | 16.7    | 1                                   |
| % <i>APOE</i> ε4 allele [+]*          | 33.3                                    | 26      | 34.4    | 1                                   |
| % Braak NFT stage V or VI*            | 28.6                                    | 54.4    | 48.6    | 0.441                               |
| % HS-Aging                            | 14.3                                    | 31.6    | 25      | 0.674                               |
| DG: % [+] TDP-43 inclusions           | 14                                      | 30      | 31      | 0.673                               |
| DG: median # inclusions in [+] cases  | 1                                       | 3       | 3       |                                     |
| CA1: % [+] TDP-43 inclusions          | 14                                      | 44      | 33      | 0.407                               |
| CA1: median # inclusions in [+] cases | 13                                      | 3       | 7.5     |                                     |
| CA1 TDP-43 neurites, median           | 8.38E-3                                 | 1.76E-3 | 1.42E-3 | 0.883                               |
| Sub: % [+] TDP-43 inclusions          | 14                                      | 30      | 31      | 0.558                               |
| Sub: median # inclusions in [+] cases | 21                                      | 6       | 16.5    |                                     |
| Sub TDP-43 neurites, median           | 2.00E-3                                 | 1.99E-3 | 2.34E-3 | 0.832                               |
| % with Frontal Cx TDP-43              | 0                                       | 8.8     | 2.8     | 1                                   |
| T4 fg/mg brain tissue, Avg            | 190.1                                   | 199.1   | 189.2   | 0.871                               |
| T3 fg/mg brain tissue, Avg            | 6.77                                    | 7.97    | 7.51    | 0.229                               |
| Average of T3/T4 ratio, Avg           | 0.036                                   | 0.040   | 0.040   | 0.566                               |
| PMI (hrs), Avg                        | 4.5                                     | 5.1     | 4.5     | 0.987                               |

\*- *APOE* genotype was available on 120/136 (88.2%) of the included subjects, and final MMSE scores were available for 126/136 (92.6%) of subjects. N/A: Not applicable.

**Supplemental Spreadsheet**

Additional information about evaluated SNPs and PCR-based SNP assay kits is presented in Excel spreadsheet format



# WORKFLOW

N=136 cases from UK-ADC autopsy cohort

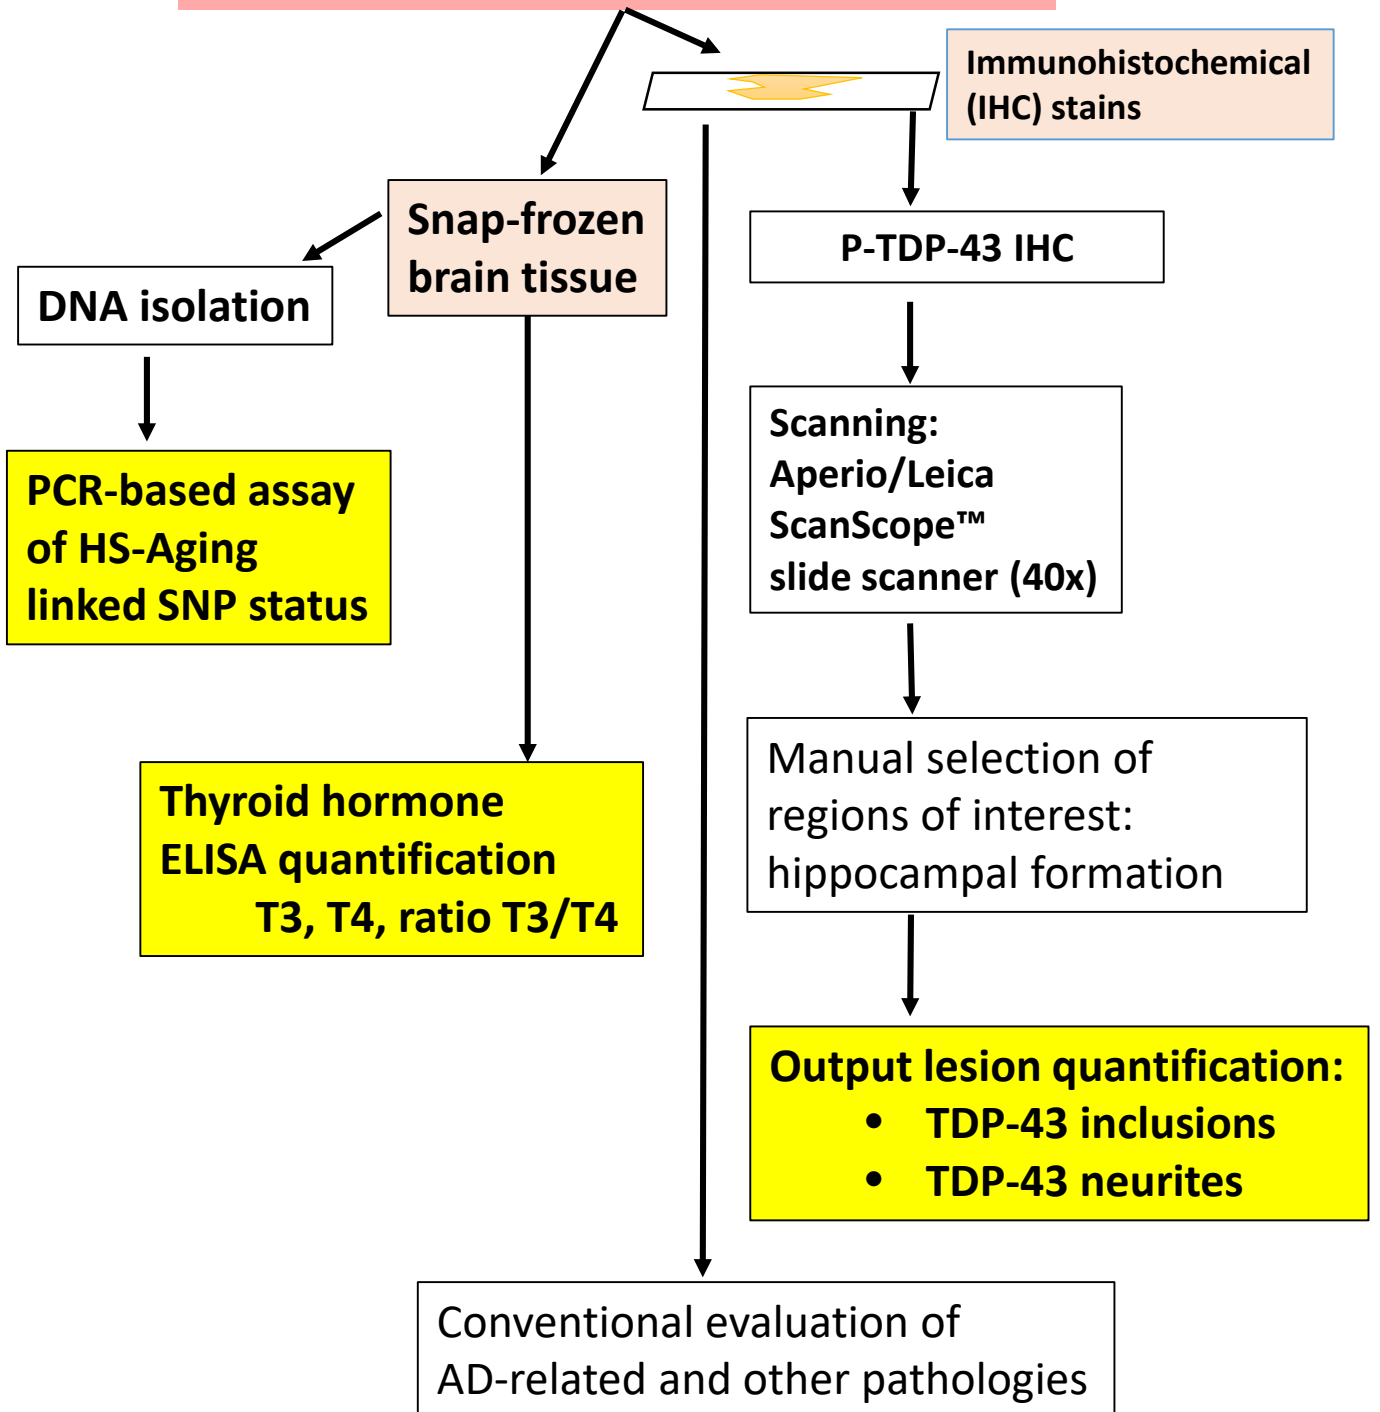

# rs5848

## Allelic Discrimination Plot

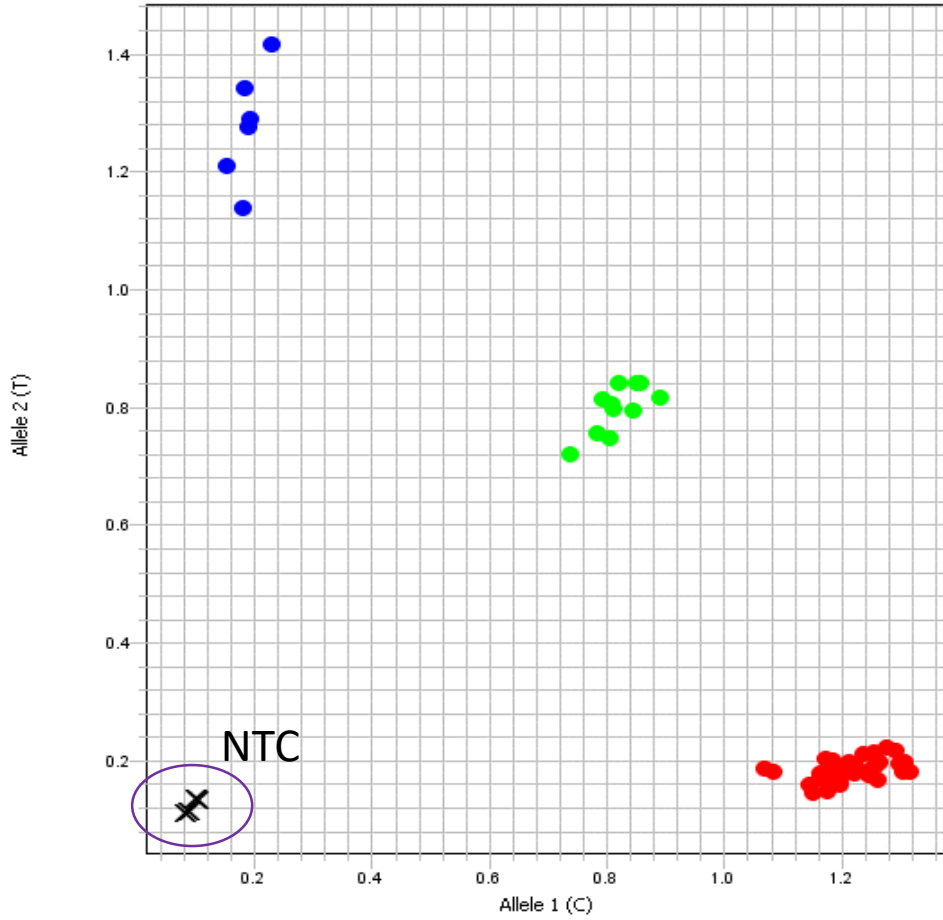

### Legend

- Homozygous Allele 1 (C)/Allele 1 (C)
- Homozygous Allele 2 (T)/Allele 2 (T)
- Heterozygous Allele 1 (C)/Allele 2 (T)
- × Undetermined

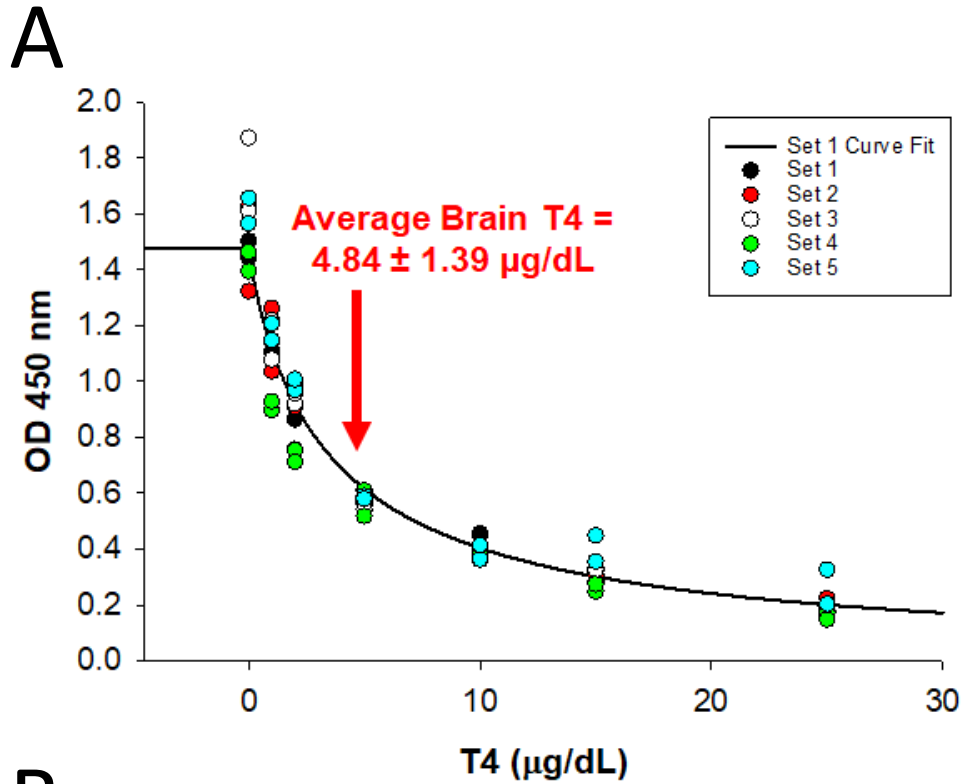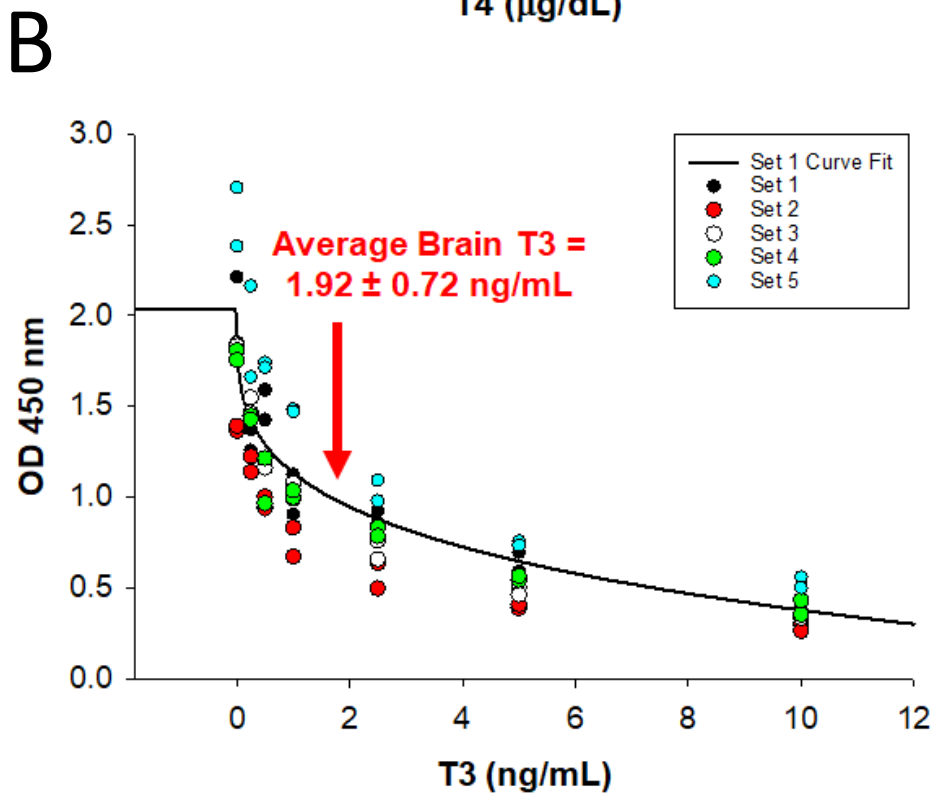

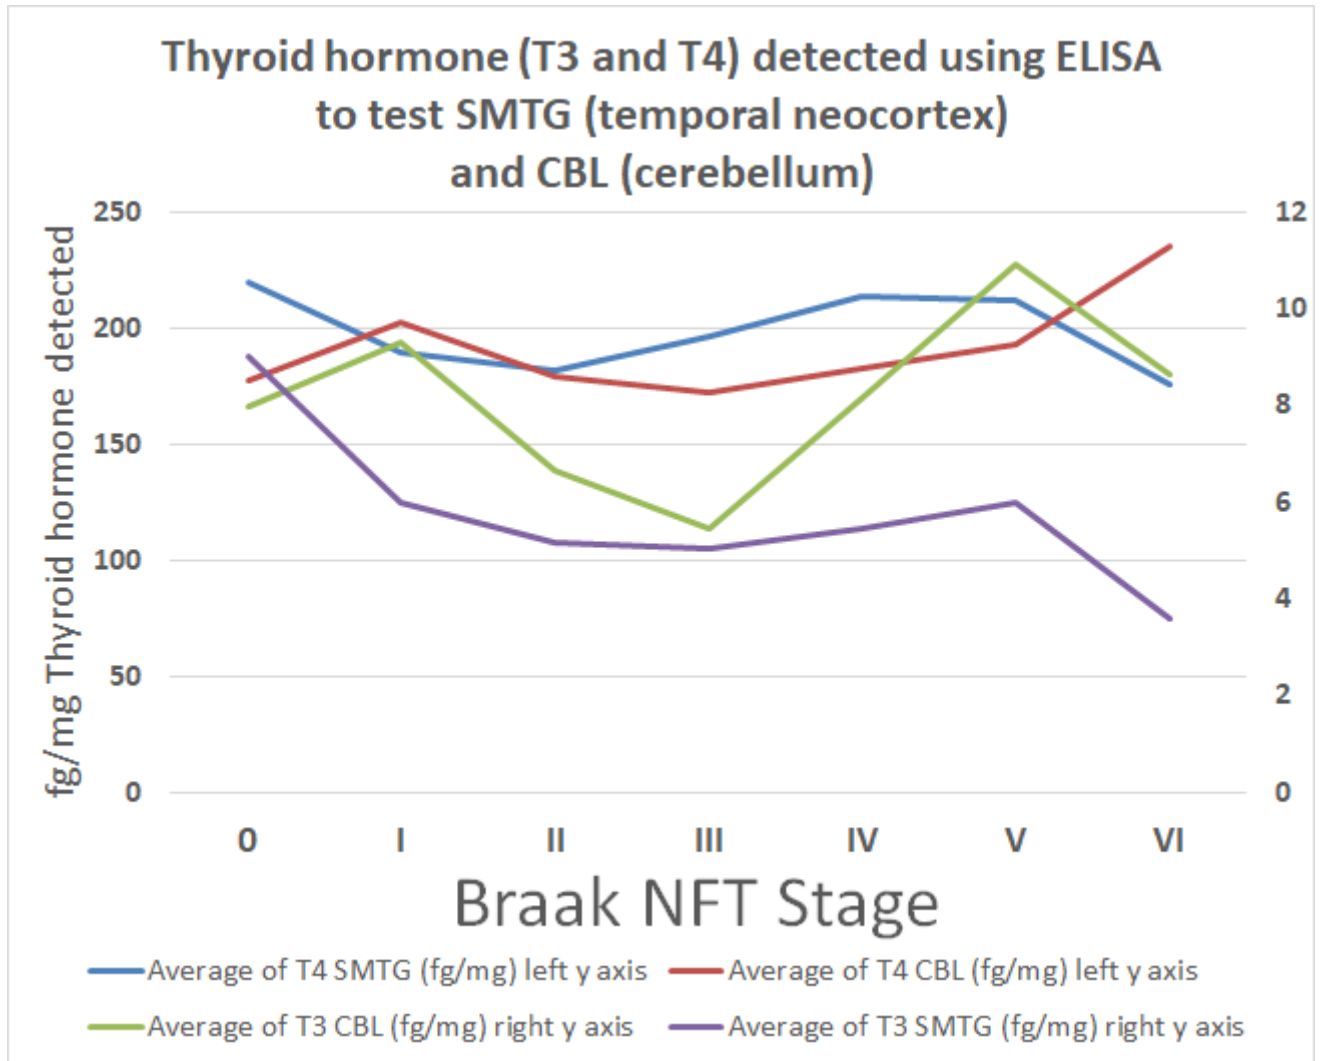

Detected triiodothyronine (T3) and thyroxine (T4) for each case (n=136)

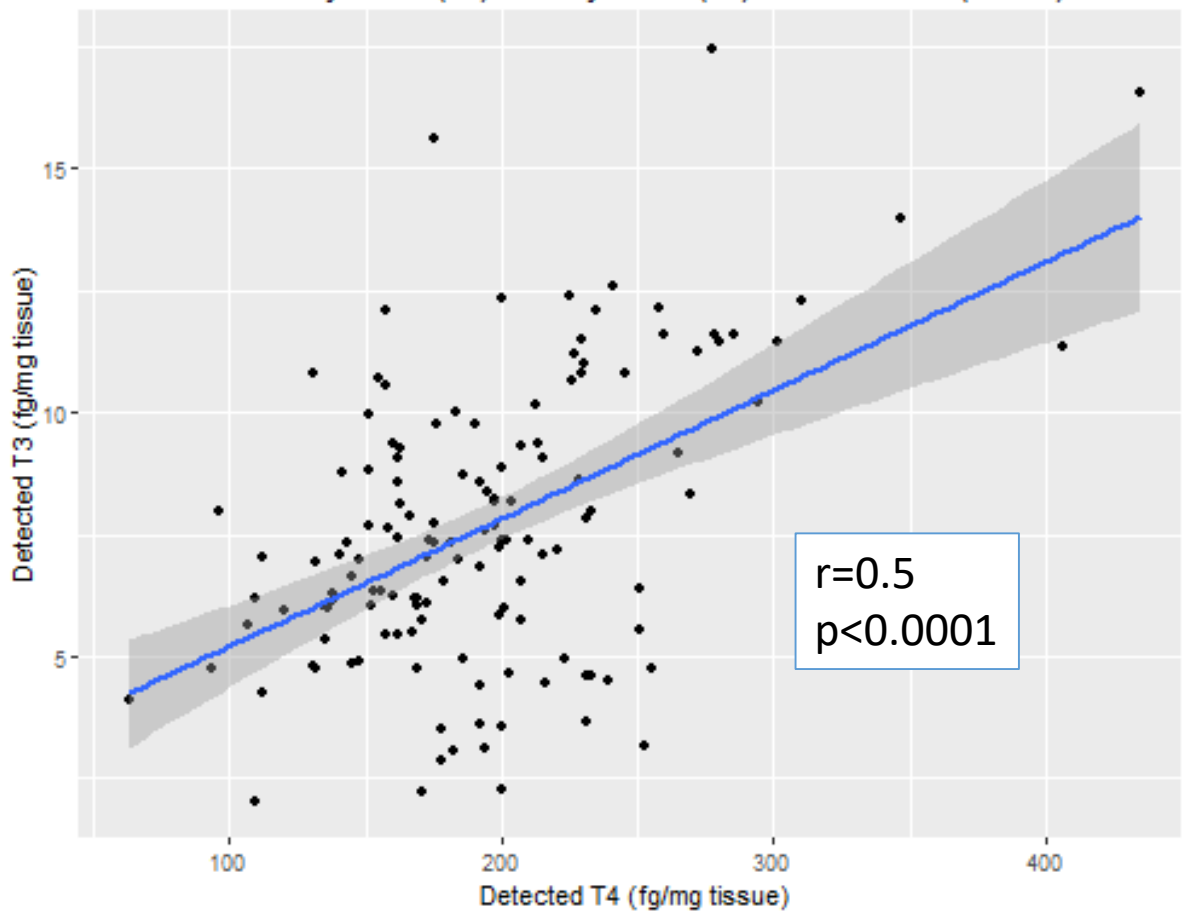

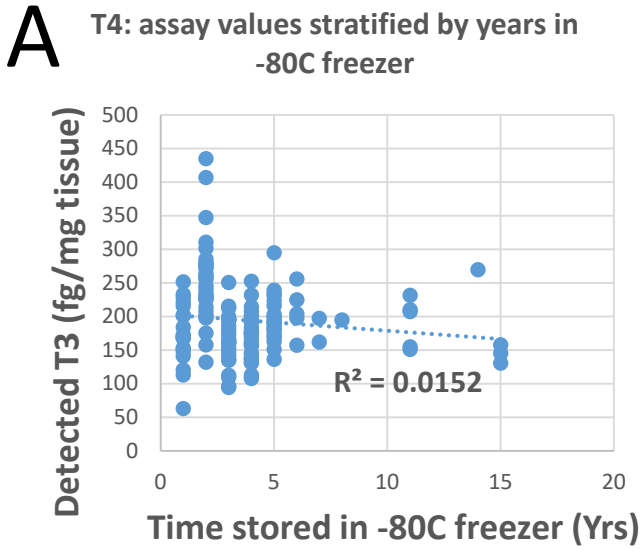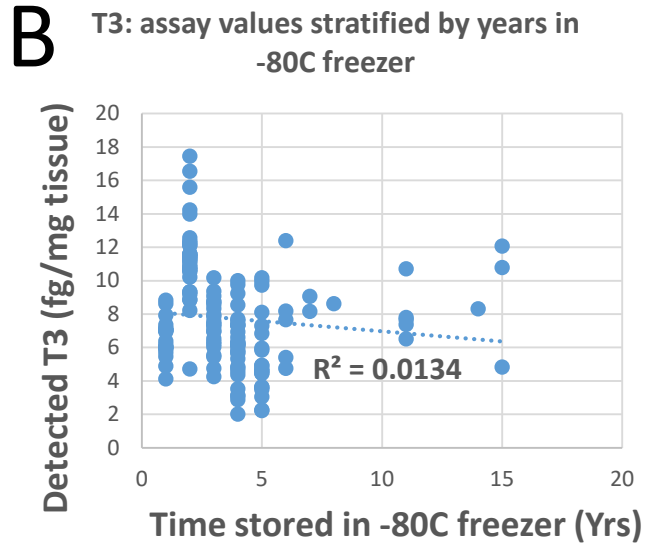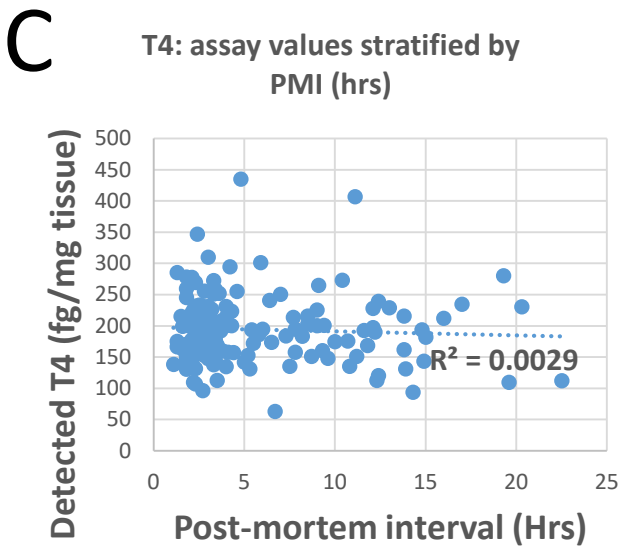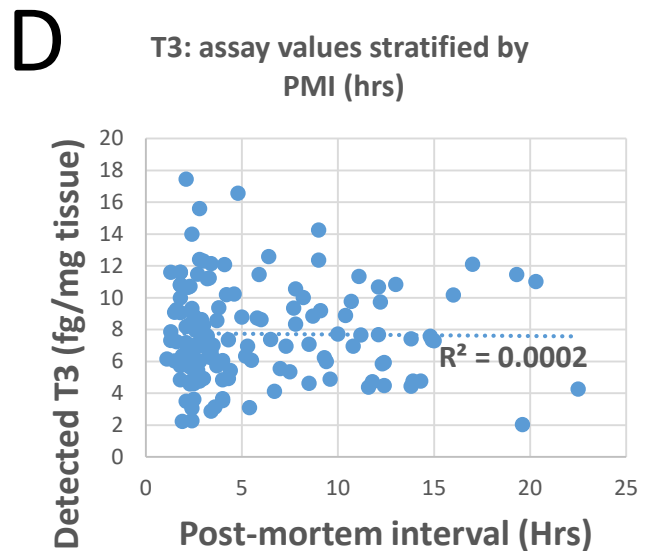

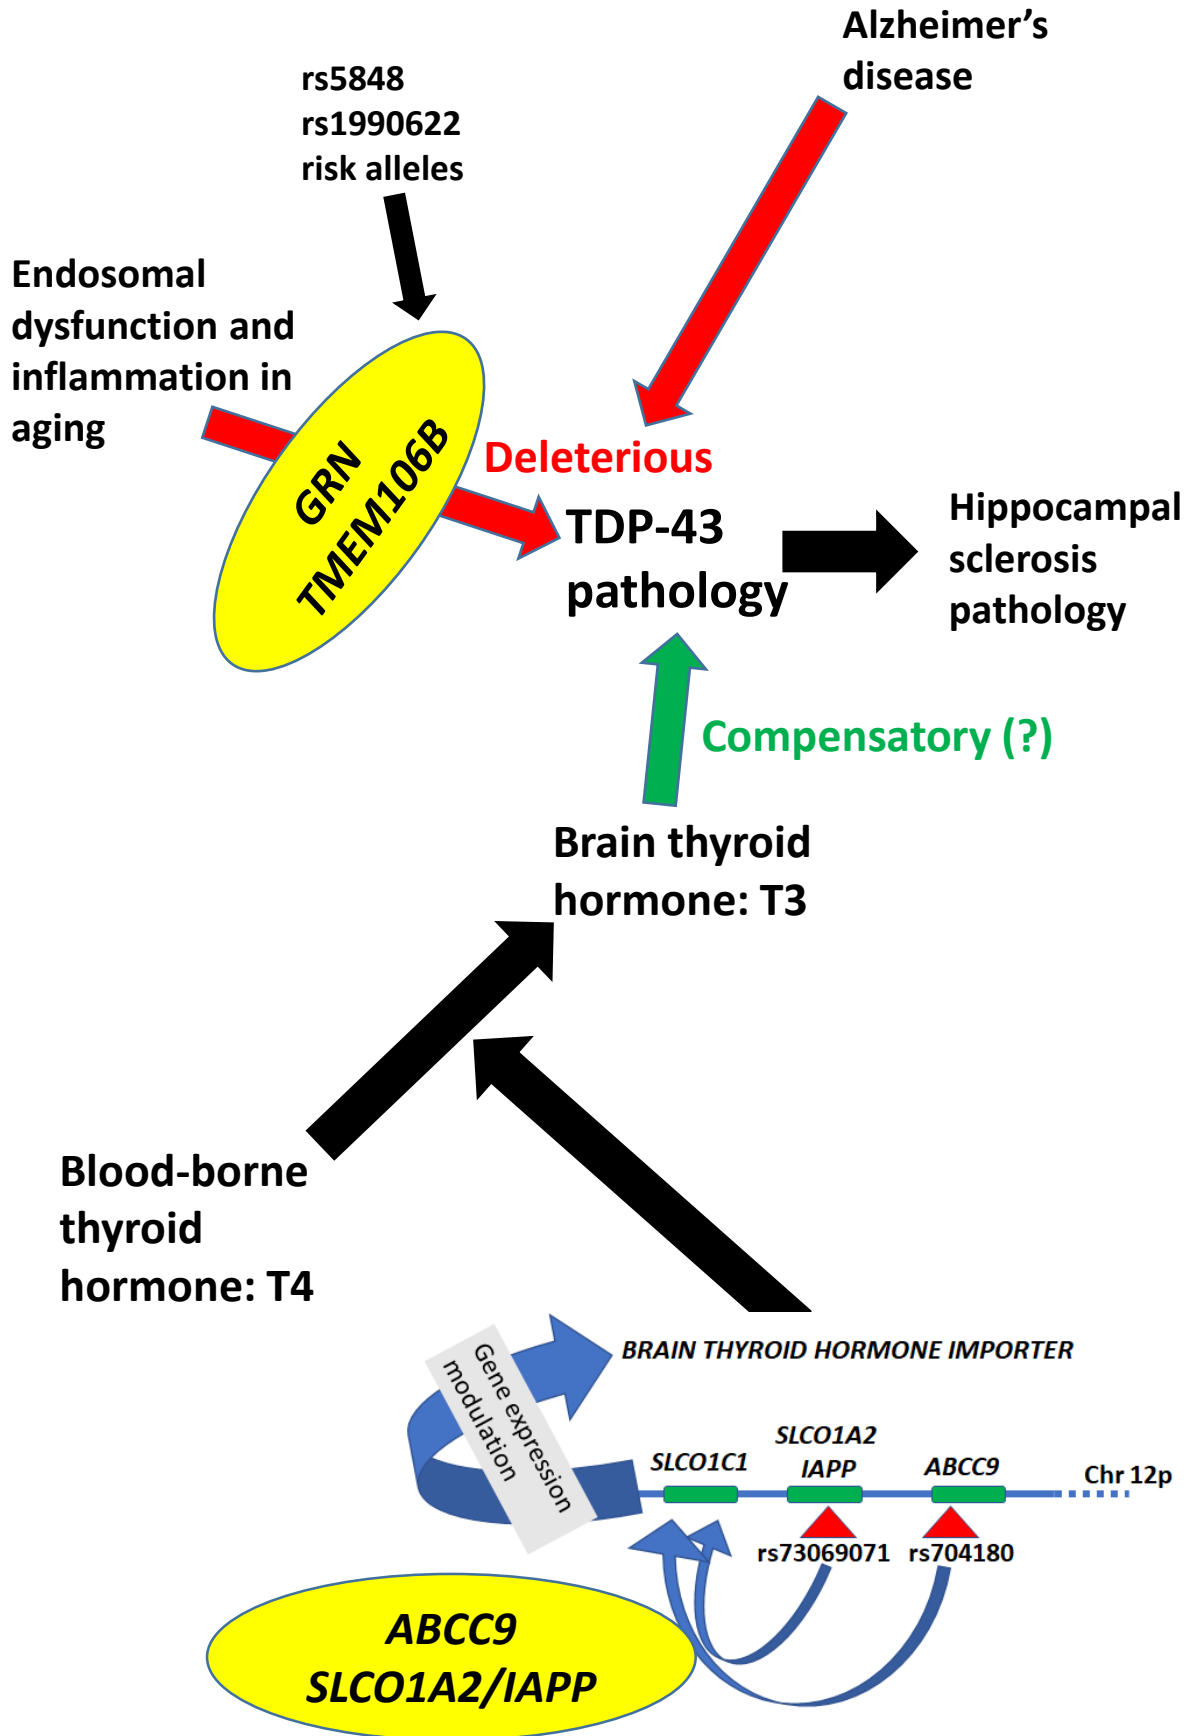

Supplement: NIHMS1032964-supplement-1.pdf [file NIHMS1032964-supplement-1.pdf]
